# Supplementary material for: Genetic Screen in Drosophila Larvae Links ird1 Function to Toll Signaling in the Fat Body and Hemocyte Motility
Source: PubMed Central journal article supplement (PMC4965076; doi:10.1371/journal.pone.0159473), 2016-07-28
Supplement: pone.0159473.s003.pdf [file pone.0159473.s003.pdf]

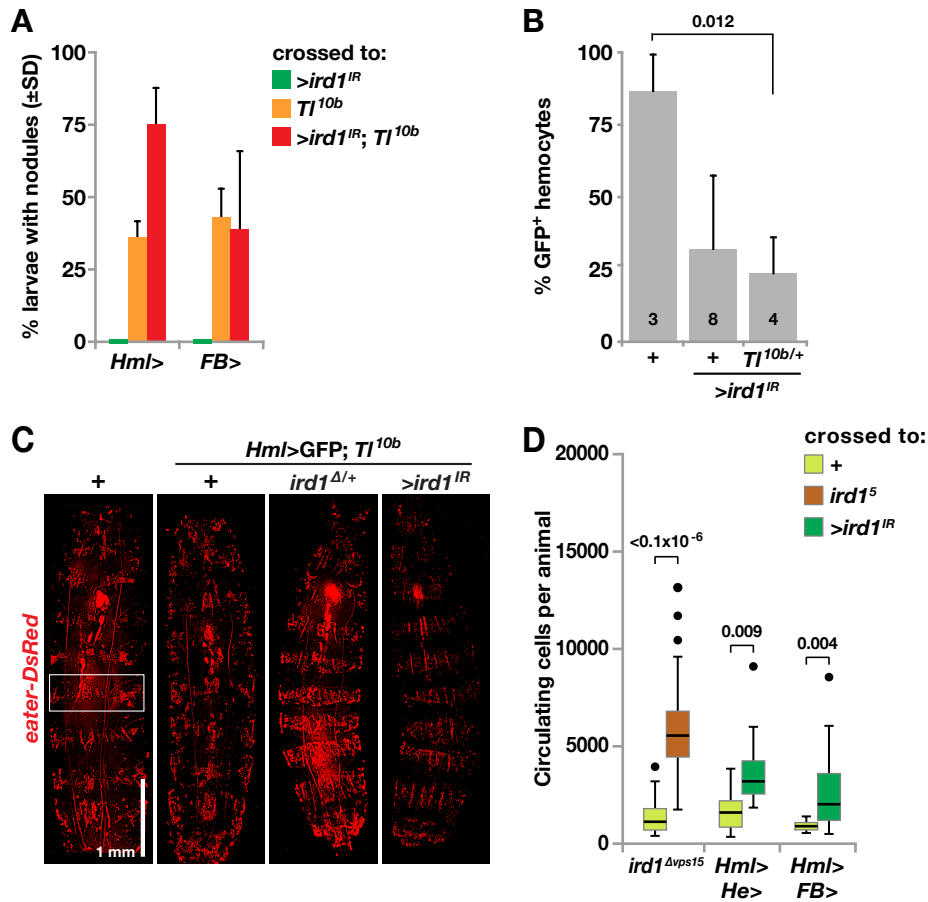

**S3 Fig. Hemocyte phenotypes of *ird1* mutants and in *ird1*-suppressed larvae, with or without the *Tl<sup>10b</sup>* allele.** **A.** Mean fraction of larvae with at least one melanotic nodule in three independent crosses, with 50 inspected larvae per indicated genotype and cross. **B.** Mean fraction of circulating blood cells that express *Hml<sup>Δ</sup>-Gal4*-driven *UAS-GFP* fluorescence in hemocyte smears from larvae that carry the driver, alone or together with *UAS-ird1<sup>IR</sup>* (>*ird1<sup>IR</sup>*) in wild-type (+) or *Tl<sup>10b</sup>* genetic background. The number of analyzed images is indicated within the bars and the significance level as estimated by Mann-Whitney U exact test (two-tailed) above. **C.** The plasmatocyte-specific reporter *eater-DsRed* visualizes the pattern of sessile cells in third instar larvae heterozygous for the *Tl<sup>10b</sup>* allele (*Tl<sup>10b/+</sup>*), alone or in combination with either the heterozygous *ird1<sup>Δups15</sup>* allele (*ird1<sup>Δ/+</sup>*) or *Hml<sup>Δ</sup>-Gal4* (*Hml*>) driven *ird1<sup>IR</sup>*, compared to the wild-type control (+). The *UAS-GFP* construct was present on the same chromosome as the *Hml<sup>Δ</sup>-Gal4* driver, but the green channel is not shown here. The white frame indicates the segmental area used to quantify the number of sessile cells in Fig 3. **D.** The number of hemocytes in hemolymph from *ird1* null (*ird1<sup>5</sup>/ird1<sup>Δups15</sup>*) larvae compared to heterozygous controls (+/*ird1<sup>Δups15</sup>*) and larvae carrying *Cg-GAL4* (*Cg*>) or *Hml<sup>Δ</sup>-Gal4* (*Hml*>) combined with either *He-GAL4* (*Hml*>*He*>) or *FB-GAL4* (*Hml*>*FB*>) drivers, alone or in combination with *ird1<sup>IR</sup>*. Box-plots show medians, quartiles and outliers of hemocyte numbers from 10 larvae per genotype. Significance values for differences as estimated by pairwise comparisons using Kruskal-Wallis ANOVA test. Non-significant differences are not indicated.
