# Supplementary material for: Genetic Screen in Drosophila Larvae Links ird1 Function to Toll Signaling in the Fat Body and Hemocyte Motility
Source: PubMed Central journal article supplement (PMC4965076; doi:10.1371/journal.pone.0159473), 2016-07-28
Supplement: pone.0159473.s004.pdf [file pone.0159473.s004.pdf]

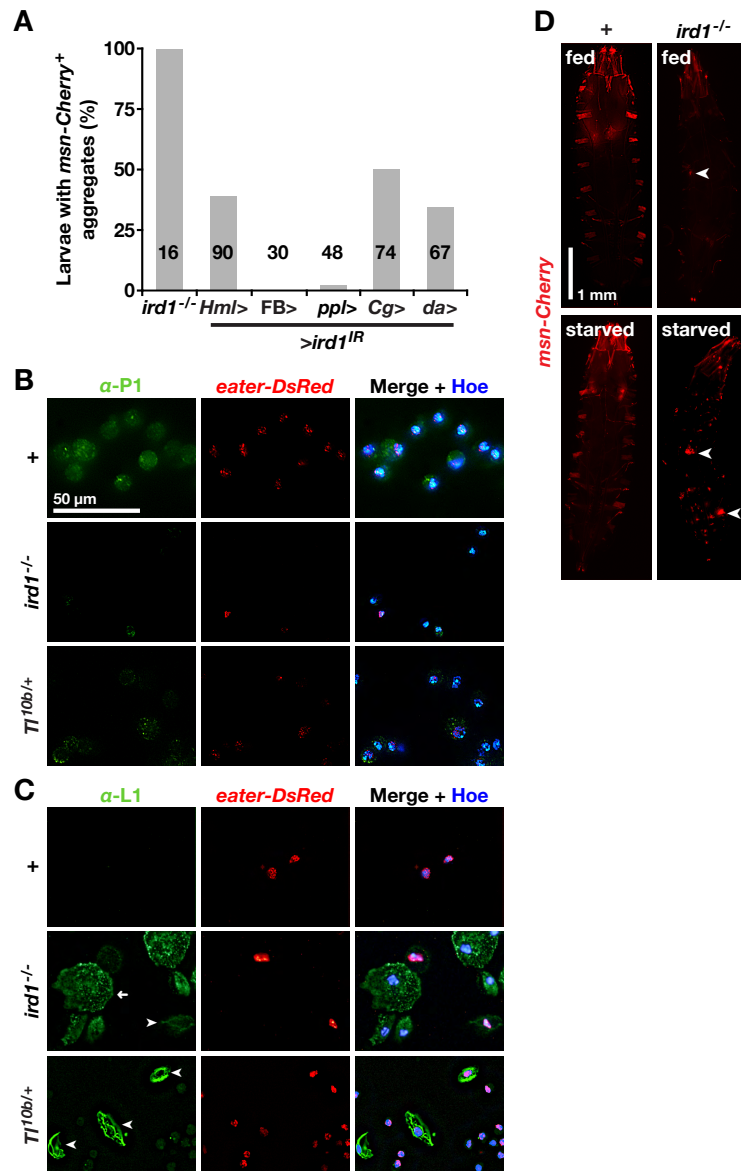

**S4 Fig. *ird1* hemocyte phenotypes as seen with *msn-Cherry*, *eater-DsRed*, and antibody markers.** **A.** Fraction of *ird1* null (*ird1*<sup>-/-</sup>) or *ird1* RNAi (>*ird1*<sup>IR</sup>) larvae showing at least one blood cell accumulation visualized by the *msn-Cherry* lamellocyte reporter. The *UAS-ird1*<sup>IR</sup> (>*ird1*<sup>IR</sup>) construct was expressed with hemocyte (*Hml*>), fat body (*FB*> and *ppl*>), fat body+hemocyte (*Cg*>), or ubiquitous (*da*>) drivers. The number of analyzed individuals of each genotype is indicated. **B-C.** Hemocytes from wild-type (+), *Tl<sup>1ob</sup>* heterozygous (*Tl<sup>1ob/+</sup>*), or *ird1* functional null (*ird1*<sup>-/-</sup>) larvae, carrying the *eater-DsRed* plasmatocyte reporter, stained with Hoechst nuclear dye (blue) and (B) plasmatocyte- or (C) lamellocyte-specific antibodies (green). Arrowheads and arrows in C indicate lamellocytes that have retained or lost *eater-DsRed* expression, respectively. **D.** Expression of the *msn-mCherry* lamellocyte marker in control (+) and *ird1*<sup>-/-</sup> larvae, before and after starvation. Arrowheads indicate lamellocyte accumulations. The *msn-mCherry* marker was also strongly expressed ectopically in parts of the larval musculature.
