# Supplementary material for: Genetic Screen in Drosophila Larvae Links ird1 Function to Toll Signaling in the Fat Body and Hemocyte Motility
Source: PubMed Central journal article supplement (PMC4965076; doi:10.1371/journal.pone.0159473), 2016-07-28
Supplement: pone.0159473.s007.pdf [file pone.0159473.s007.pdf]

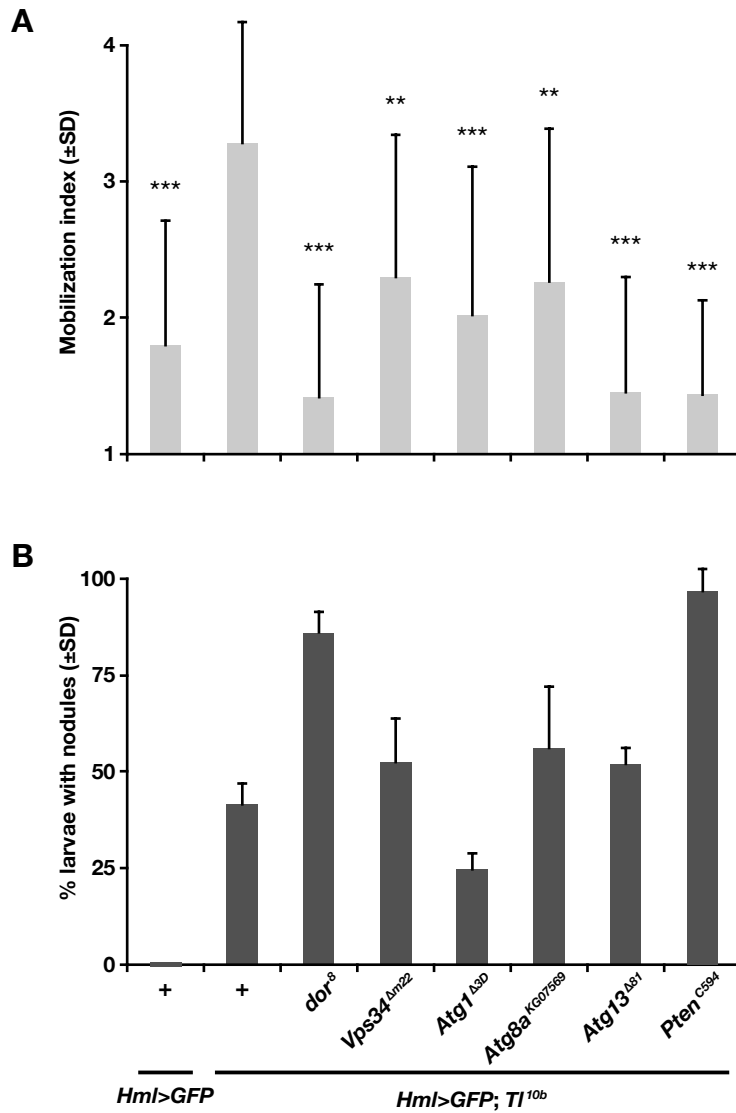

**S7 Fig. Modification of *Tl<sup>10b</sup>* phenotype by mutants of vesicle transport genes.** **A.** Average mobilization index and **B** percentage of animals expressing *UAS-GFP* with blood cell specific *Hml<sup>Δ</sup>-Gal4* (*Hml>*) driver with at least one melanotic nodule among wild-type control, or *Tl<sup>10b</sup>* larvae with or without the indicated loss-of-function alleles. Three independent experiments were performed for each genotype, 20 larvae were graded and 50 were inspected for nodules in each. Significant difference (\*\*\*,  $p < 0.0001$ ; \*\*,  $p < 0.001$ ) compared to the *Tl<sup>10b</sup>* mutant control, as estimated by pairwise comparisons using Kruskal-Wallis ANOVA test. Non-significant differences are not indicated.
