# Supplementary material for: Genetic Screen in Drosophila Larvae Links ird1 Function to Toll Signaling in the Fat Body and Hemocyte Motility
Source: PubMed Central journal article supplement (PMC4965076; doi:10.1371/journal.pone.0159473), 2016-07-28
Supplement: pone.0159473.s009.pdf [file pone.0159473.s009.pdf]

**S1 Table. Mobilization index (MI) for the deficiencies tested in the screen**

|    | Deficiency ID  | N(crosses ) | N(larvae ) | MI            | SEM  | Genes              |
|----|----------------|-------------|------------|---------------|------|--------------------|
| 1  | Df(3R)ED5020   | 6           | 41         | 2.54          | 0.30 | <i>tube</i>        |
| 2  | Df(3R)ED5142   | 4           | 14         | 2.77          | 0.38 |                    |
| 3  | Df(3R)ED5066   | 1           | 10         | 3.70          |      |                    |
| 4  | Df(3R)ED5138   | 4           | 29         | 3.14          | 0.16 |                    |
| 5  | Df(3R)ED5147   | 1           | 15         | 2.67          |      |                    |
| 6  | Df(3R)ED5156   | 2           | 27         | 2.92          | 0.11 |                    |
| 7  | Df(3R)ED10257  | 1           | 17         | <b>2.41</b>   | 0.19 |                    |
| 8  | Df(3R)ED5177   | 4           | 24         | 2.83          | 0.43 |                    |
| 9  | Df(3R)Exel7283 | 2           | 32         | <b>1.86</b>   | 0.34 | <i>Rab23</i>       |
| 10 | Df(3R)ED5187   | 3           | 47         | <b>2.47</b>   | 0.36 |                    |
| 11 | Df(3R)ED5197   | 7           | 70         | <b>1.75</b>   | 0.34 | <i>Rab23</i>       |
| 12 | Df(3R)ED5196   | 4           | 39         | 2.62          | 0.18 | <i>Rab23</i>       |
| 13 | Df(3R)Exel6145 | 2           | 32         | <b>2.18</b>   | 0.05 |                    |
| 14 | Df(3R)Exel7284 | 2           | 36         | <b>1.77</b>   | 0.35 |                    |
| 15 | Df(3R)ED7665   | 2           | 21         | <b>2.47</b>   | 0.18 |                    |
| 16 | Df(3R)ED5221   | 4           | 35         | 2.63          | 0.28 |                    |
| 17 | Df(3R)ED5223   | 5           | 39         | <b>2.31</b>   | 0.25 |                    |
| 18 | Df(3R)ED5220   | 4           | 38         | 2.84          | 0.10 |                    |
| 19 | Df(3R)ED5230   | 5           | 42         | 2.69          | 0.14 |                    |
| 20 | Df(3R)ED5301   | 2           | 32         | 2.81          | 0.31 |                    |
| 21 | Df(3R)ED5331   | 2           | 32         | 2.80          | 0.34 |                    |
| 22 | Df(3R)ED5343   | 4           | 40         | <b>2.10</b>   | 0.20 | <i>pum/D1/ird1</i> |
| 23 | Df(3R)Exel6151 | 2           | 36         | 3.19          | 0.34 |                    |
| 24 | Df(3R)Exel6152 | 2           | 32         | <b>1.84</b>   | 0.09 | <i>pum/D1/ird1</i> |
| 25 | Df(3R)ED5339   | 2           | 34         | <b>1.85</b>   | 0.07 | <i>pum/D1/ird1</i> |
| 26 | Df(3R)Exel9036 | 2           | 36         | 3.61          | 0.01 |                    |
| 27 | Df(3R)ED5428   | 1           | 16         | <b>2.30</b>   |      |                    |
| 28 | Df(3R)ED5438   | 2           | 15         | <b>2.47</b>   | 0.08 |                    |
| 29 | Df(3R)ED5454   | 3           | 24         | 2.67          | 0.35 |                    |
| 30 | Df(3R)ED5474   | 1           | 15         | 3.27          |      |                    |
| 31 | Df(3R)ED5495   |             |            | <b>lethal</b> |      |                    |
| 32 | Df(3R)ED5506   | 4           | 28         | <b>2.36</b>   | 0.16 |                    |
| 33 | Df(3R)ED5518   | 1           | 15         | 3.00          |      |                    |
| 34 | Df(3R)ED5516   | 1           | 16         | 3.06          |      |                    |
| 35 | Df(3R)ED5559   |             |            | <b>lethal</b> |      |                    |
| 36 | Df(3R)ED5554   | 3           | 16         | 2.50          | 0.15 |                    |
| 37 | Df(3R)ED5573   |             |            | <b>lethal</b> |      |                    |
| 38 | Df(3R)ED5591   | 4           | 21         | 2.62          | 0.28 |                    |
| 39 | Df(3R)ED5610   | 2           | 33         | 2.79          | 0.32 |                    |
| 40 | Df(3R)Exel6166 | 2           | 34         | 3.38          | 0.21 |                    |
| 41 | Df(3R)Exel7318 | 2           | 35         | <b>2.21</b>   | 0.21 |                    |
| 42 | Df(3R)ED5608   | 4           | 60         | <b>1.78</b>   | 0.19 |                    |
| 43 | Df(3R)ED5612   | 5           | 55         | <b>2.31</b>   | 0.18 |                    |
| 44 | Df(3R)ED5613   | 3           | 26         | 2.69          | 0.28 |                    |
| 45 | Df(3R)ED5623   |             |            | <b>lethal</b> |      |                    |
| 46 | Df(3R)ED5644   | 1           | 17         | 2.90          |      |                    |
| 47 | Df(3R)Exel8160 | 1           | 18         | 2.72          |      |                    |
| 48 | Df(3R)ED5664   | 2           | 20         | 3.05          | 0.22 |                    |
| 49 | Df(3R)Exel6275 | 1           | 10         | <b>2.30</b>   |      |                    |
| 50 | Df(3R)ED10556  | 1           | 16         | 3.05          |      |                    |

(continued)

S1 Table (continued)

|    | Deficiency ID  | N(crosses ) | N(larvae ) | MI            | SEM  | Genes             |
|----|----------------|-------------|------------|---------------|------|-------------------|
| 51 | Df(3R)Exel6172 | 1           | 18         | <b>2.28</b>   |      |                   |
| 52 | Df(3R)Exel6173 | 1           | 17         | 3.53          |      |                   |
| 53 | Df(3R)ED5688   | 1           | 16         | 3.56          |      |                   |
| 54 | Df(3R)ED5705   |             |            | <b>lethal</b> |      |                   |
| 55 | Df(3R)ED10639  | 1           | 16         | 2.56          |      |                   |
| 56 | Df(3R)ED10642  | 3           | 45         | 2.69          | 0.52 |                   |
| 57 | Df(3R)ED5780   | 3           | 33         | <b>1.76</b>   | 0.30 |                   |
| 58 | Df(3R)Exel6176 | 1           | 15         | <b>1.73</b>   |      |                   |
| 59 | Df(3R)ED5781   | 3           | 32         | <b>2.19</b>   | 0.37 |                   |
| 60 | Df(3R)ED5794   |             |            | <b>lethal</b> |      |                   |
| 61 | Df(3R)ED5815   | 2           | 18         | 2.61          | 0.08 |                   |
| 62 | Df(3R)ED2      | 1           | 11         | 3.27          |      |                   |
| 63 | Df(3R)ED5911   | 3           | 14         | 2.57          | 0.29 |                   |
| 64 | Df(3R)ED6025   | 4           | 34         | 2.74          | 0.15 |                   |
| 65 | Df(3R)ED10820  | 1           | 17         | 2.53          |      |                   |
| 66 | Df(3R)ED10845  | 1           | 11         | 2.91          |      |                   |
| 67 | Df(3R)ED6052   | 1           | 16         | 3.39          |      |                   |
| 68 | Df(3R)ED6058   |             |            | <b>lethal</b> |      |                   |
| 69 | Df(3R)ED6076   | 2           | 20         | <b>2.35</b>   | 0.32 |                   |
| 70 | Df(3R)ED6093   |             |            | <b>lethal</b> |      |                   |
| 71 | Df(3R)ED6096   | 2           | 21         | 2.57          | 0.31 |                   |
| 72 | Df(3R)ED6103   | 3           | 22         | 2.68          | 0.25 |                   |
| 73 | Df(3R)ED6105   | 3           | 46         | <b>2.37</b>   | 0.24 |                   |
| 74 | Df(3R)ED10894  | 1           | 16         | 2.94          |      |                   |
| 75 | Df(3R)ED6187   |             |            | <b>lethal</b> |      |                   |
| 76 | Df(3R)ED6220   | 2           | 31         | <b>2.35</b>   | 0.65 |                   |
| 77 | Df(3R)ED10951  | 1           | 15         | 2.80          |      |                   |
| 78 | Df(3R)Exel6204 | 2           | 34         | <b>1.71</b>   | 0.18 |                   |
| 79 | Df(3R)ED6232   | 3           | 39         | <b>1.67</b>   | 0.31 |                   |
| 80 | Df(3R)ED6235   | 1           | 18         | <b>1.33</b>   |      |                   |
| 81 | Df(3R)ED6255   | 2           | 19         | 2.79          | 0.49 | <i>Tl/spz/pll</i> |
| 82 | Df(3R)ED6265   | 4           | 28         | 2.93          | 0.19 | <i>pll</i>        |
| 83 | Df(3R)ED10970  | 1           | 17         | 2.82          |      |                   |
| 84 | Df(3R)ED6310   | 2           | 11         | 2.64          | 0.02 |                   |
| 85 | Df(3R)ED6316   | 3           | 23         | 2.87          | 0.25 |                   |
| 86 | Df(3R)ED6332   | 3           | 38         | <b>2.17</b>   | 0.29 | <i>hdc</i>        |
| 87 | Df(3R)ED6346   | 1           | 12         | 2.92          |      |                   |
| 88 | Df(3R)ED6361   | 1           | 16         | 3.00          |      |                   |

**Strong suppressor****Weak suppressor****Lethal**
